# Supplementary material for: A tailored programme to implement recommendations for multimorbid patients with polypharmacy in primary care practices—process evaluation of a cluster randomized trial
Source: Implement Sci. 2017 Mar 6;12:31. doi: 10.1186/s13012-017-0559-y (PMC5339959; doi:10.1186/s13012-017-0559-y)
Supplement: Additional file 2: — Checklist for Medication Review. (ZIP 247 kb) [file 13012_2017_559_MOESM2_ESM.zip]

Archive with 2 entries (2 files):
- additional file 2_checklist medication review_English translationR1.pdf
- additional file 2_checklist medication review_German originalR1.pdf
